# Supplementary material for: Enhancing the luminescence performance of an LED-pumped Mn4+-activated highly efficient double perovskite phosphor with A-site defectsvialocal lattice tuning
Source: Royal Society of Chemistry journal article supplement (doi:10.1039/d2dt02806a), 2022-01-01
Supplement: d2dt02806a1.pdf [file d2dt02806a1.pdf]

**Supplementary Information of “Enhancing luminescence performance of LED-pumped Mn<sup>4+</sup>-activated highly efficient double perovskite phosphor with A-site defects via local lattice tuning”**

Liang Li<sup>1</sup>, Qianwen Cao<sup>1</sup>, Jing Xie<sup>1</sup>, Wenming Wang<sup>1</sup>, Hongmei Chen<sup>1</sup>, Yubei

Wang<sup>1</sup>, Zhongyuan Li<sup>2</sup>, Yan Pan<sup>3\*</sup>, Xiantao Wei<sup>4\*</sup>, Yong Li<sup>1\*</sup>

1. School of Mathematics and Physics, Anhui University of Technology, Maanshan 243000, China
2. Key Laboratory of Functional Molecular Solids, Ministry of Education and College of Chemistry and Materials Science, Anhui Normal University, Wuhu 241000, PR China
3. Analysis and Testing central Facility, Anhui University of Technology, Maanshan 243000, China.
4. Physics Experiment Teaching Center, School of Physical Sciences, University of Science and Technology of China, Hefei, 230026, China

\*Email<sup>1</sup>: yongli@ahut.edu.cn; \*Email<sup>2</sup>: [yanpan@ahut.edu.cn](mailto:yanpan@ahut.edu.cn); \*Email<sup>3</sup>: [wxt@ustc.edu.cn](mailto:wxt@ustc.edu.cn);

Table S1. The cell parameters, refinement factors, and bond distances of the LMTO: 0.4 mol%Mn<sup>4+</sup> and LMTO: 0.4 mol%Mn<sup>4+</sup>, 0.2 mol%Ca<sup>2+</sup> phosphors.

| Formula                                                  | LMTO:0.4 mol%Mn <sup>4+</sup> | LMTO:0.4 mol%Mn <sup>4+</sup> , 0.2mol%Ca <sup>2+</sup> |
|----------------------------------------------------------|-------------------------------|---------------------------------------------------------|
| crystal system                                           | Monoclinic                    | Monoclinic                                              |
| space group                                              | I <sub>2/m</sub> (12)         | I <sub>2/m</sub> (12)                                   |
| a (Å)                                                    | 5.6377                        | 5.6342                                                  |
| B (Å)                                                    | 5.6293                        | 5.6255                                                  |
| C (Å)                                                    | 7.9564                        | 7.9486                                                  |
| V (Å <sup>3</sup> )                                      | 252.51                        | 251.93                                                  |
| α=γ (°)                                                  | 90                            | 90                                                      |
| β (°)                                                    | 89.9999                       | 90.0112                                                 |
| R <sub>wp</sub> (%)                                      | 7.47                          | 8.09                                                    |
| R <sub>p</sub> (%)                                       | 5.78                          | 6.38                                                    |
| χ <sup>2</sup>                                           | 1.95                          | 2.32                                                    |
| bond distance Ta <sub>1</sub> -O <sub>1</sub> (Å)<br>(2) | 2.072                         | 2.069                                                   |
| bond distance Ta <sub>1</sub> -O <sub>2</sub> (Å)<br>(4) | 2.129                         | 2.128                                                   |
| bond distance Ta <sub>1</sub> -Ta <sub>1</sub> (Å)       | 5.6293(3)                     | 5.6255(2)                                               |

Table S2. The atomic coordinates, Wyckoff position, and occupancy of the LMTO: 0.4 mol%Mn<sup>4+</sup> sample.

| atom            | Wyckoff<br>f<br>position | fractional coordinates |        |         | occupancy<br>(×100%) | Uiso  |
|-----------------|--------------------------|------------------------|--------|---------|----------------------|-------|
|                 |                          | x                      | y      | z       |                      |       |
| La              | 4i                       | 0.5026                 | 0      | 0.2530  | 0.833                | 0.005 |
| Mg              | 2a                       | 0                      | 0      | 0       | 1.00                 | 0     |
| Ta              | 2d                       | 0.5                    | 0.5    | 0       | 0.996                | 0     |
| O <sub>1</sub>  | 4i                       | 0.0809                 | 0      | 0.2460  | 1.00                 | 0     |
| O <sub>2</sub>  | 8j                       | 0.2395                 | 0.2298 | -0.0321 | 1.00                 | 0     |
| Mn <sub>1</sub> | 2d                       | 0.5                    | 0.5    | 0       | 0.004                | 0.006 |

Table S3. Atomic ratios of the LMTO: 3.0 mol%Mn<sup>4+</sup> samples for theoretical and measured values.

| Element (LMTO: 3.0<br>mol%Mn <sup>4+</sup> ) | La    | Mg    | Ta    | O     | Mn   |
|----------------------------------------------|-------|-------|-------|-------|------|
| Atomic ratio (%)                             | 19.51 | 10.93 | 9.92  | 57.78 | 1.86 |
| Theoretical ratio (%)                        | 17.24 | 10.34 | 10.03 | 62.07 | 0.31 |

Table S4. The atomic coordinates, Wyckoff position, and occupancy of the LMTO: 0.4 mol%Mn<sup>4+</sup>, 0.2 mol%Ca<sup>2+</sup> sample.

| atom            | Wyckoff<br>position | fractional coordinates |        |         | occupancy<br>(×100%) | Uiso  |
|-----------------|---------------------|------------------------|--------|---------|----------------------|-------|
|                 |                     | x                      | y      | z       |                      |       |
| La              | 4i                  | 0.5026                 | 0      | 0.2530  | 0.831                | 0     |
| Mg              | 2a                  | 0                      | 0      | 0       | 1.00                 | 0.002 |
| Ta              | 2d                  | 0.5                    | 0.5    | 0       | 0.996                | 0     |
| O <sub>1</sub>  | 4i                  | 0.0809                 | 0      | 0.2460  | 1.00                 | 0     |
| O <sub>2</sub>  | 8j                  | 0.2395                 | 0.2298 | -0.0321 | 1.00                 | 0.002 |
| Mn <sub>1</sub> | 2d                  | 0.5                    | 0.5    | 0       | 0.004                | 0     |
| Ca <sub>1</sub> | 4i                  | 0.5026                 | 0      | 0.2530  | 0.002                | 0.01  |

Table S5 Internal quantum efficiency and thermal stability of representative Mn<sup>4+</sup>-activated matrix materials reported in the last three years.

| Num. | Matrices material                                                 | Internal quantum efficiency (%) | I <sub>PL420K</sub> /I <sub>PL273K</sub> (%) | Ref.      |
|------|-------------------------------------------------------------------|---------------------------------|----------------------------------------------|-----------|
|      | La <sub>1.67</sub> MgTaO <sub>6</sub>                             | 72.65                           | 57.23                                        | This work |
| 1    | Ba <sub>2</sub> LaTaO <sub>6</sub>                                | 26.8                            | 5.5                                          | 1         |
| 2    | Sr <sub>2</sub> InTaO <sub>6</sub>                                | 10.15                           | 2.4                                          | 2         |
| 3    | Sr <sub>2</sub> GdTaO <sub>6</sub>                                | 15.27                           | 31.17                                        | 3         |
| 4    | Ba <sub>2</sub> GdNbO <sub>6</sub>                                | 29.7                            | ~35                                          | 4         |
| 5    | BaSrGdNbO <sub>6</sub>                                            | 33.6                            | ~42                                          | 4         |
| 6    | BaSrYNbO <sub>6</sub>                                             | 34.6                            | ~47                                          | 4         |
| 7    | Ca <sub>14</sub> Ga <sub>10</sub> Zn <sub>6</sub> O <sub>35</sub> | 38.0                            | 41.2                                         | 5         |
| 8    | Ca <sub>2</sub> YSbO <sub>6</sub>                                 | 62.6                            | 40                                           | 6         |
| 9    | Sr <sub>2</sub> InSbO <sub>6</sub>                                | 22.67                           | 48                                           | 7         |
| 10   | CaMg <sub>2</sub> La <sub>2</sub> W <sub>2</sub> O <sub>12</sub>  | 44                              | 35                                           | 8         |

|    |                                                   |      |       |    |
|----|---------------------------------------------------|------|-------|----|
| 11 | Ba <sub>2</sub> YTaO <sub>6</sub>                 | 41.5 | 37    | 9  |
| 12 | Li <sub>4</sub> AlSbO <sub>6</sub>                | 54.8 | -     | 10 |
| 13 | Ca <sub>3</sub> Al <sub>4</sub> ZnO <sub>10</sub> | 30   | 38    | 11 |
| 14 | Sr <sub>3</sub> NaSbO <sub>6</sub>                | 56.2 | 39.84 | 12 |
| 15 | Li <sub>3</sub> Mg <sub>2</sub> TaO <sub>6</sub>  | 23   | -     | 13 |
| 16 | KLaMgWO <sub>6</sub>                              | 43   | -     | 14 |
| 17 | Cs <sub>2</sub> NbOF <sub>5</sub>                 | 81.7 | ~18   | 15 |
| 18 | K <sub>2</sub> NaGaF <sub>6</sub>                 | 61   | 71.9  | 16 |
| 19 | Cs <sub>2</sub> KGaF <sub>6</sub>                 | 80.2 | ~45   | 17 |
| 20 | Cs <sub>2</sub> SiF <sub>6</sub>                  | 69   | 70    | 18 |
| 21 | K <sub>2</sub> TiF <sub>6</sub>                   | 93   | 30    | 18 |
| 22 | Na <sub>2</sub> SiF <sub>6</sub>                  | 70   | 70    | 18 |

Table S6. The CIE chromaticity coordinates, CRI, and CCT of the warm wLEDs are prepared by different phosphor ratios.

| Ratio    | Coordinate      | CRI  | CCT    |
|----------|-----------------|------|--------|
| Y:R=1:0  | (0.2944,0.3264) | 76.5 | 7595 K |
| Y:R=1:5  | (0.3101,0.3305) | 80.6 | 6395 K |
| Y:R=1:10 | (0.3266,0.3313) | 84.5 | 5775 K |
| Y:R=1:15 | (0.3552,0.3582) | 86.1 | 4658 K |

Table S7 Lumen efficiency (lm/W) of the wLEDs devices prepared with different ratios. of phosphors at different driving currents.

| Ratio    | 10 mA  | 20 mA  | 40 mA  | 60 mA  | 100 mA |
|----------|--------|--------|--------|--------|--------|
| Y:R=1:0  | 140.42 | 129.25 | 122.22 | 119.42 | 112.40 |
| Y:R=1:5  | 109.99 | 92.47  | 80.85  | 74.72  | 68.29  |
| Y:R=1:10 | 85.06  | 69.06  | 55.70  | 51.59  | 45.01  |
| Y:R=1:15 | 72.66  | 57.92  | 47.30  | 41.00  | 36.66  |

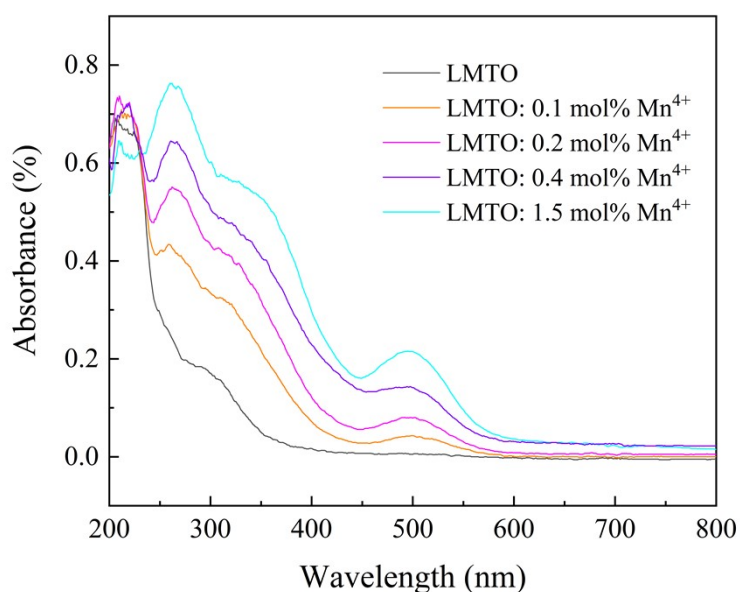

Fig. S1 Absorption spectra of perfect LMTO samples and samples with different Mn<sup>4+</sup> doping concentrations.

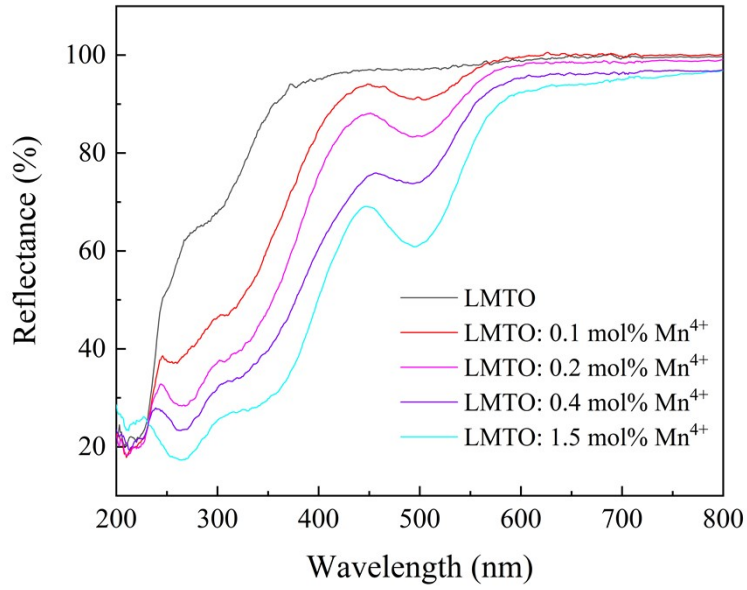

Fig. S2 Diffuse reflectance spectra of perfect LMTO samples and samples with different  $\text{Mn}^{4+}$  doping concentrations.

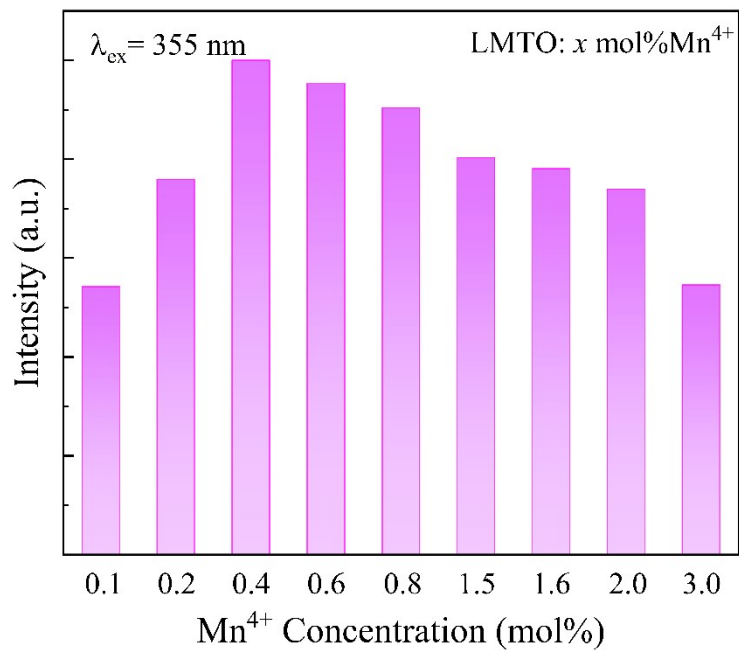

Fig. S3. Histogram of the integrated emission intensity for the LMTO phosphor with different  $\text{Mn}^{4+}$  ion concentrations.

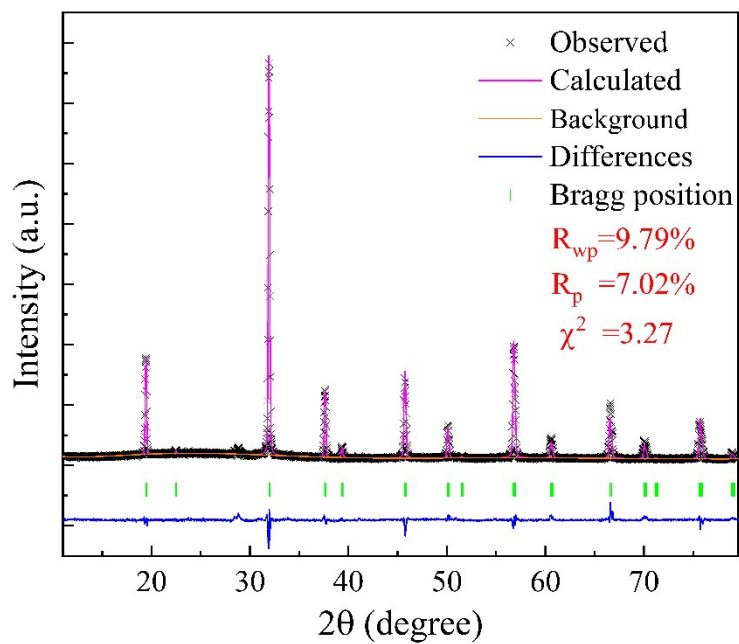

Fig. S4. The Rietveld refined XRD pattern of the sample co-doped with  $\text{Li}^+$  ions.

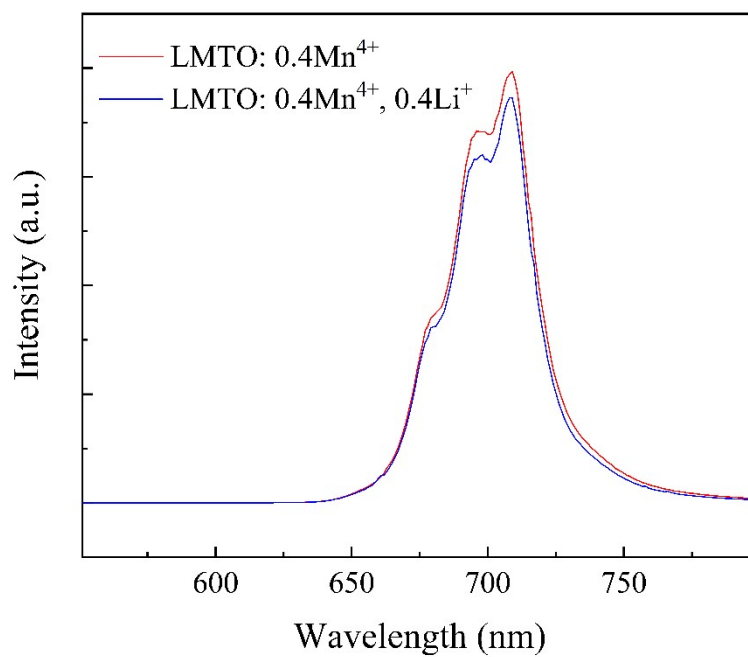

Fig. S5. The PL spectra of the samples doped and without doped  $\text{Li}^+$  ions.

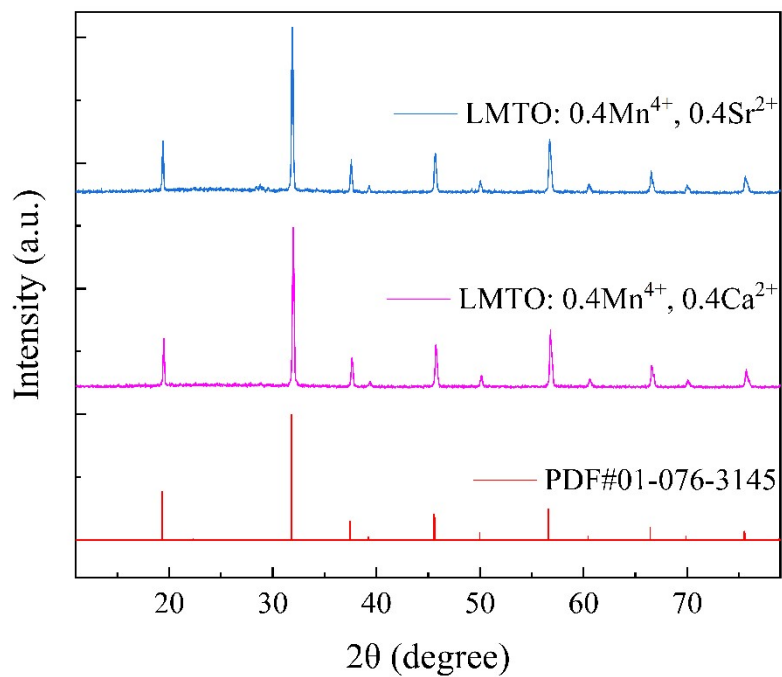

Fig. S6. The XRD curves of samples after co-doping with Ca<sup>2+</sup> or Sr<sup>2+</sup> ions and the LMTO compound standard PDF card.

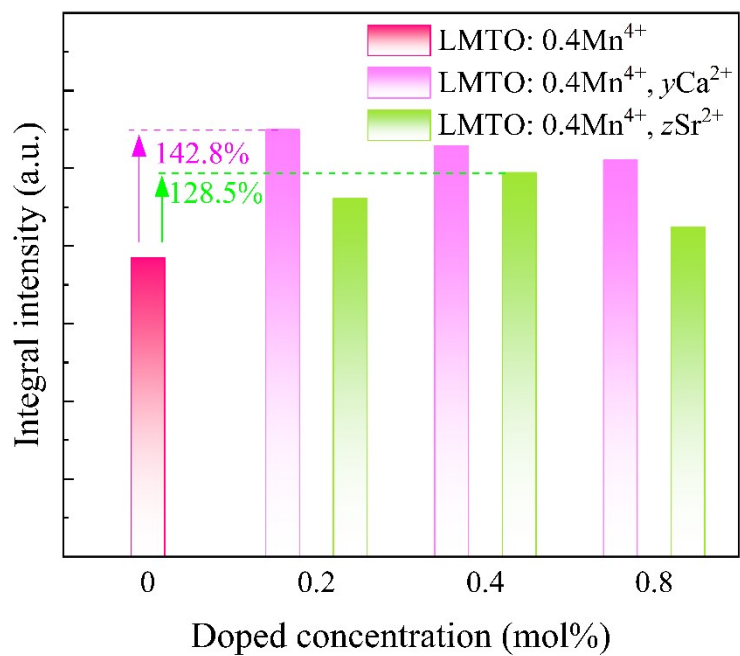

Fig. S7. Histogram of the integrated emission intensity for the samples after co-doping with Ca<sup>2+</sup> or Sr<sup>2+</sup> ions.

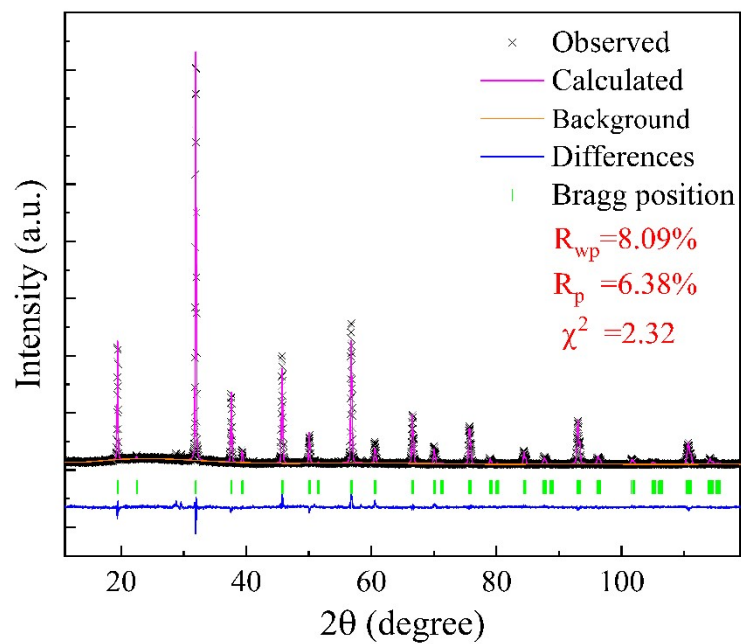

Fig. S8. The XRD pattern after Rietveld refinement of the LMTO: 0.4 mol%Mn<sup>4+</sup>, 0.2 mol%Ca<sup>2+</sup> sample.

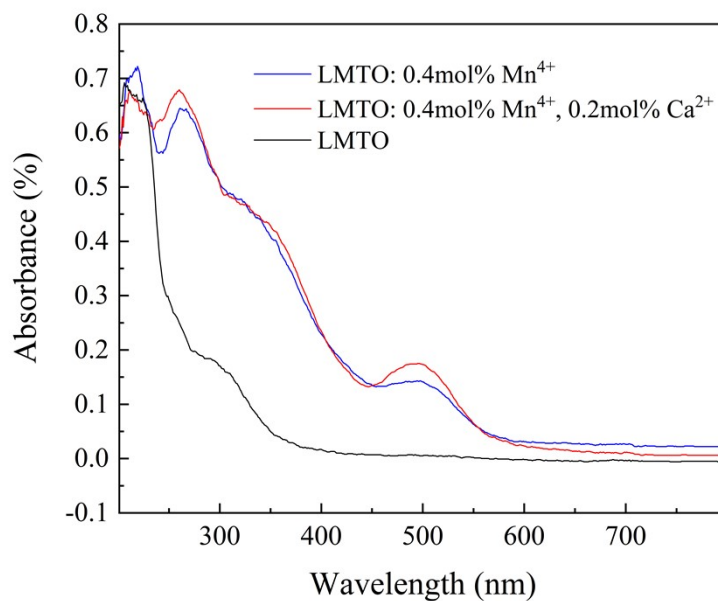

Fig. S9 Absorption spectra of samples with and without Ca<sup>2+</sup> ions doping.

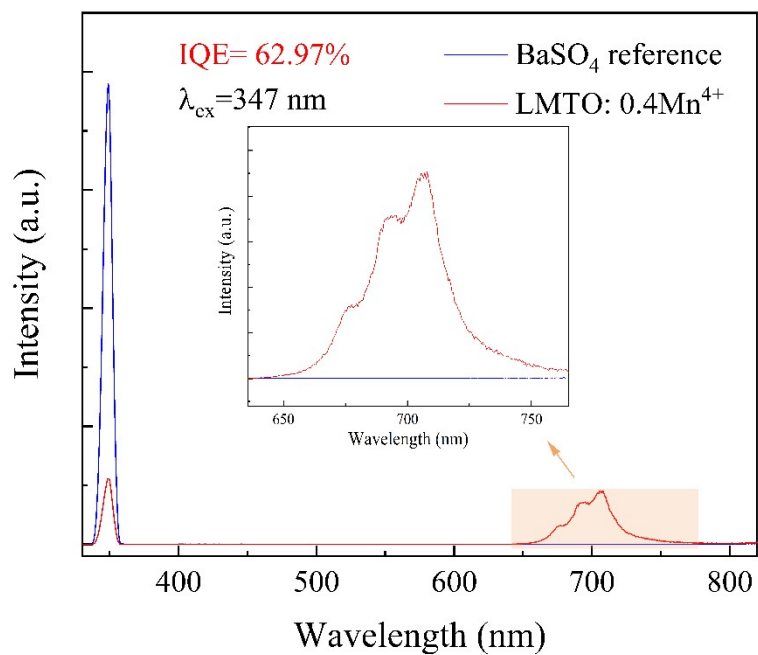

Fig. S10. The IQE of the LMTO: 0.4 mol%Mn<sup>4+</sup> sample.

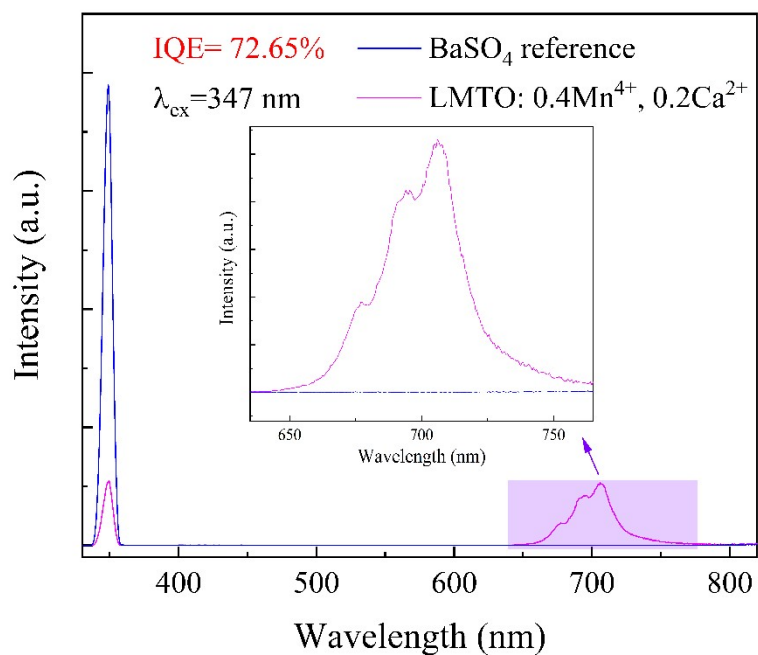

Fig. S11. The IQE of the LMTO: 0.4 mol%Mn<sup>4+</sup>, 0.2 mol%Ca<sup>2+</sup> sample.



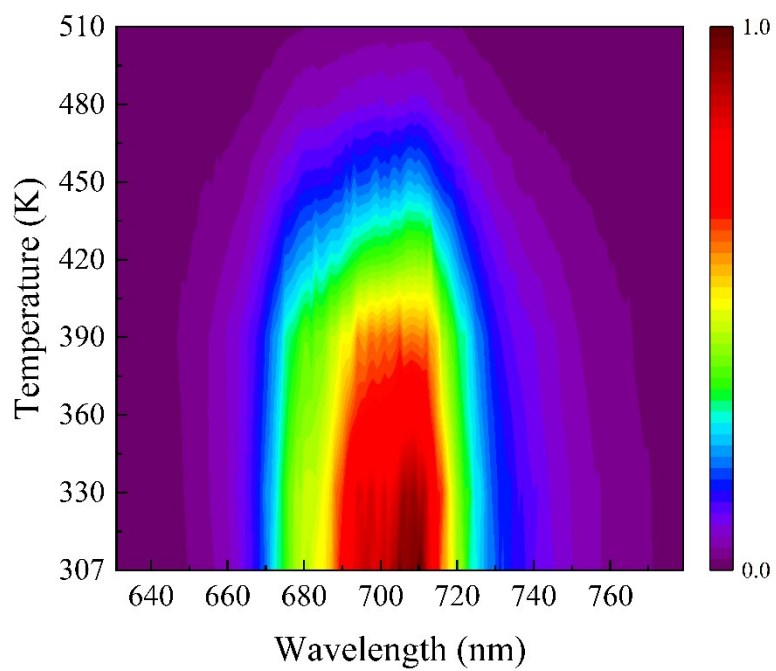

Fig. S12. The two-dimensional contour plot of the PL spectra with temperature for the LMTO: 0.4 mol%Mn<sup>4+</sup> sample.

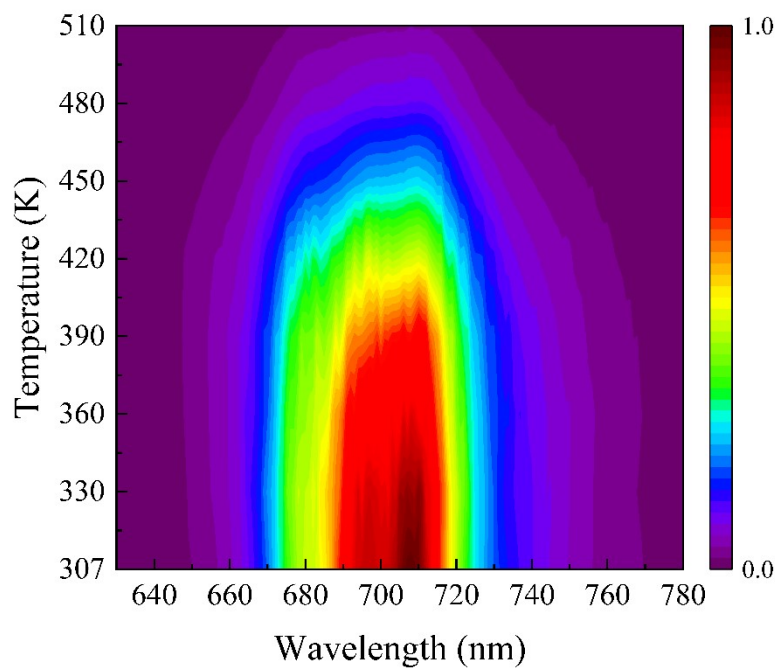

Fig. S13. The two-dimensional contour plot of the PL spectra with temperature for the LMTO: 0.4 mol%Mn<sup>4+</sup>, 0.2 mol%Ca<sup>2+</sup> sample.

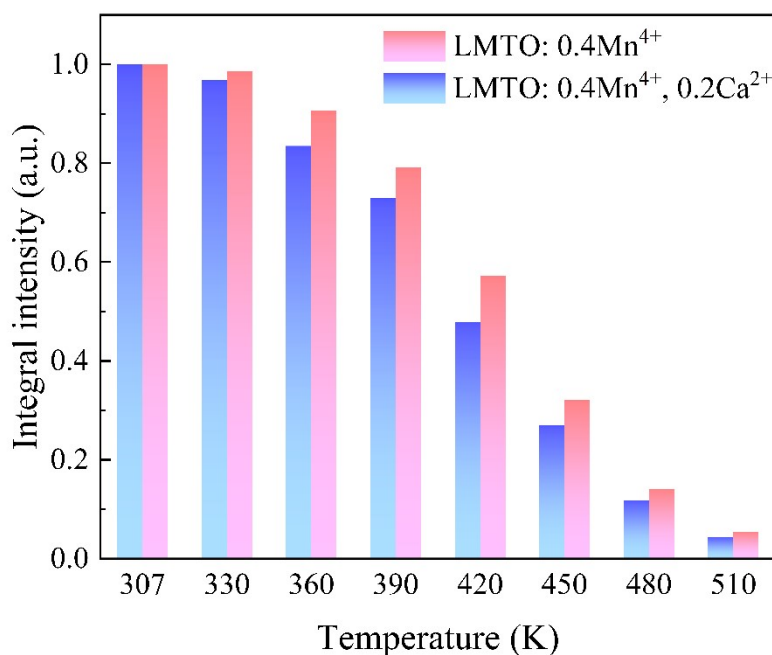

Fig. S14. Histogram of integrated emission intensity at different temperatures for the samples with and without co-doped Ca<sup>2+</sup> ions.

## References

1. L. Li, Q. Cao, J. Wang, Z. Li, Y. Pan, X. Wei and Y. Li, *Ceramics International*, 2022, DOI: <https://doi.org/10.1016/j.ceramint.2022.08.170>.
2. Q. Cao, L. Li, Y. Wang, W. Wang, H. Chen, Y. Pan, X. Wei and Y. Li, *Journal of Luminescence*, 2022, **252**, 119351.
3. Z. Wu, L. Li, H. Li, L. Mei, W. Xia, Y. Yi and Y. Hua, *Dalton Transactions*, 2022, **51**, 9062-9071.
4. Q. Zhu, M. Li, Y. Jin, Z. Mei, J. Gao, J. Huo and Q. Wang, *Chemical Engineering Journal*, 2021, **424**, 130571.
5. Y. Zhong, S. Gai, M. Xia, S. Gu, Y. Zhang, X. Wu, J. Wang, N. Zhou and Z. Zhou, *Chemical Engineering Journal*, 2019, **374**, 381-391.
6. J. Zhong, D. Chen, X. Chen, K. Wang, X. Li, Y. Zhu and Z. Ji, *Dalton Transactions*, 2018, **47**, 6528-6537.
7. Y. Xie, X. Geng, Y. Wang, J. Guo, Y. Lu, Q. Lv, Z. Ma, D. zhang, J. Zhao, B. Deng and R. Yu, *Journal of the American Ceramic Society*, 2022, **105**, 1300-1317.
8. N. Ma, W. Li, B. Devakumar, Z. Zhang and X. Huang, *Materials Today Chemistry*, 2021, **21**, 100512.
9. W. Li, N. Ma, Q. Sun, S. Wang, Z. Zhang, B. Devakumar and X. Huang, *Journal of Luminescence*, 2020, **228**, 117621.
10. G. Li, G. Liu, Q. Mao, G. Du, X. Li, Y. Zhu, T. Yang, H. Yu, Z. Ji and J. Zhong, *Ceramics International*, 2021, **47**, 27609-27616.
11. L. Sun, B. Devakumar, J. Liang, S. Wang, Q. Sun and X. Huang, *Journal of Alloys and Compounds*, 2019, **785**, 312-319.
12. L. Shi, J.-x. Li, Y.-j. Han, W.-l. Li and Z.-w. Zhang, *Journal of Luminescence*, 2019, **208**, 201-207.

13. S. Wang, Q. Sun, J. Liang, L. Sun, B. Devakumar and X. Huang, *Inorganic Chemistry Communications*, 2020, **116**, 107903.
14. J. Liang, B. Devakumar, L. Sun, Q. Sun, S. Wang, B. Li, D. Chen and X. Huang, *Ceramics International*, 2019, **45**, 4564-4569.
15. J. Zhou, Y. Chen, C. Jiang, B. Milićević, M. S. Molokeev, M. G. Brik, I. A. Bobrikov, J. Yan, J. Li and M. Wu, *Chemical Engineering Journal*, 2021, **405**, 126678.
16. C. Jiang, M. G. Brik, L. Li, L. Li, J. Peng, J. Wu, M. S. Molokeev, K.-L. Wong and M. Peng, *Journal of Materials Chemistry C*, 2018, **6**, 3016-3025.
17. J. Li, Y. Wang, H. Zhe, Y. Zhou, Q. Zhou and Z. Wang, *Journal of Alloys and Compounds*, 2021, **881**, 160624.
18. X. Luo, Z. Hou, T. Zhou and R.-J. Xie, *Journal of the American Ceramic Society*, 2020, **103**, 1018-1026.
